# Supplementary material for: West Africa - A Safe Haven for Frogs? A Sub-Continental Assessment of the Chytrid Fungus (Batrachochytrium dendrobatidis)
Source: PLoS One. 2013 Feb 13;8(2):e56236. doi: 10.1371/journal.pone.0056236 (PMC3572032; doi:10.1371/journal.pone.0056236)
Supplement: Appendix S2 — List of study areas, their geographic positions as well as details of sampling and analysis for each sample. (XLS) [file pone.0056236.s002.xls]

## Sheet: Tabelle1
S2. List of study areas, their geographic positions as well as details of sampling and analysis for each sample. The following abbreviations were used: CF = Classified Forest, FR = Forest Reserve, RR = Resource Reserve, NF = National Forest, NP = National Park, * = no coordinates available, species checked before exported alive; MfN = Museum fuer Naturkunde, NWU = North-Western University, UW = U…
Geographical details				Collection		Taxonomy			Sample sizes		Analyses
Country	Site	Lat	Lon	Date(s)	Collector(s)	Family	Genus	Species	Swab	Toe/Skin	Lab(s)	Bd	ITS-4/5	16s
Benin	Albori River Debouchure, into Niger River	11.94	3.28	2009-05-29	Hirschfeld	Dicroglossidae	Hoplobatrachus	occipitalis	1	0	MfN	negative	NA	NA
Benin	Albori River Debouchure, into Niger River	11.94	3.28	2009-05-29	Hirschfeld	Ranidae	Hylarana	galamensis	1	0	MfN	negative	NA	NA
Benin	Albori River Debouchure, into Niger River	11.94	3.28	2009-05-29	Hirschfeld	Phrynobatarchidae	Phrynobatrachus	latifrons	1	0	MfN	negative	NA	NA
Benin	Cotchi, Niger River	11.88	3.42	2009-06-09	Hirschfeld	Ptychadenidae	Ptychadena	tournieri	1	0	MfN	negative	NA	NA
Benin	Goroukanbou, Albori River	11.97	3.13	2009-05-31	Hirschfeld	Dicroglossidae	Hoplobatrachus	occipitalis	1	0	MfN	negative	NA	NA
Benin	Kargi, Albori River	11.92	3.23	2009-05-30	Hirschfeld	Dicroglossidae	Hoplobatrachus	occipitalis	1	0	MfN	negative	NA	NA
Benin	Karimama	12.07	3.18	2009-05-28	Hirschfeld	Dicroglossidae	Hoplobatrachus	occipitalis	1	0	MfN	negative	NA	NA
Benin	Karimama	12.07	3.18	2009-05-28	Hirschfeld	Pipidae	Xenopus	muelleri	1	0	MfN	negative	NA	NA
Benin	Konfonou, Albori River	12	3.08	2009-05-28	Hirschfeld	Dicroglossidae	Hoplobatrachus	occipitalis	1	0	MfN	negative	NA	NA
Benin	Lokoli Forest, close to Kousukba	7.06	2.26	23.-24.5.2005	Nago, Brede, Schiefenhövel, Rödel	Ranidae	Aubria	subsigillata	0	1	NWU	negative	NA	NA
Benin	Lokoli Forest, close to Kousukba	7.06	2.26	23.-24.5.2005	Nago, Brede, Schiefenhövel, Rödel	Pipidae	Silurana	tropicalis	0	1	NWU	negative	NA	NA
Benin	Malanville	11.88	3.37	2009-05-04	Hirschfeld	Dicroglossidae	Hoplobatrachus	occipitalis	14	0	MfN	negative	NA	NA
Benin	Malanville	11.88	3.34	05.05. & 8.5.2009	Hirschfeld	Dicroglossidae	Hoplobatrachus	occipitalis	16	0	MfN	negative	NA	NA
Benin	Malanville	11.89	3.53	2009-05-06	Hirschfeld	Dicroglossidae	Hoplobatrachus	occipitalis	5	0	MfN	negative	NA	NA
Benin	Malanville, Perimeter 1	11.89	3.37	2009-05-04	Hirschfeld	Ranidae	Hylarana	galamensis	2	0	MfN	negative	NA	NA
Benin	Monio	6.66	1.75	Nov. 2003	Moritz	Phrynobatarchidae	Phrynobatrachus	latifrons	0	1	NWU	negative	NA	NA
Benin	Ouéme Delta	6.58	2.52	2003-11-20	Moritz	Phrynobatarchidae	Phrynobatrachus	latifrons	0	1	NWU	negative	NA	NA
Benin	Pendjari NP	10.86	1.4	rainy season 2008	Hirschfeld	Bufonidae	"Bufo"	pentoni	4	0	NWU	negative	NA	NA
Benin	Pendjari NP	10.86	1.4	rainy season 2008	Hirschfeld	Hyperoliidae	Afrixalus	vittiger	1	0	NWU	negative	NA	NA
Benin	Pendjari NP	10.86	1.4	rainy season 2008	Hirschfeld	Hyperoliidae	Afrixalus	weidholzi	1	0	NWU	negative	NA	NA
Benin	Pendjari NP	10.86	1.4	rainy season 2008	Hirschfeld	Bufonidae	Amietophrynus	maculatus	8	0	NWU	negative	NA	NA
Benin	Pendjari NP	10.86	1.4	rainy season 2008 / Oct. 2003, Jan. 2004, 2.9.2004	Hirschfeld (3) / Grell (2), Moritz (2), Nago & Rödel (1)	Dicroglossidae	Hoplobatrachus	occipitalis	3	5	NWU	negative	NA	NA
Benin	Pendjari NP	10.86	1.4	rainy season 2008	Hirschfeld	Hyperoliidae	Hyperolius	nitidulus	2	0	NWU	negative	NA	NA
Benin	Pendjari NP	10.86	1.4	rainy season 2008	Hirschfeld	Hyperoliidae	Kassina	cassinoides	2	0	NWU	negative	NA	NA
Benin	Pendjari NP	10.86	1.4	rainy season 2008	Hirschfeld	Arthroleptidae	Leptopelis	viridis	4	0	NWU	negative	NA	NA
Benin	Pendjari NP	10.86	1.4	rainy season 2008 / 02.09.2004	Hirschfeld (32) / Nago & Rödel (1)	Phrynobatarchidae	Phrynobatrachus	latifrons	32	1	NWU	negative	NA	NA
Benin	Pendjari NP	10.86	1.4	rainy season 2008	Hirschfeld	Phrynobatarchidae	Phrynobatrachus	natalenis	4	0	NWU	negative	NA	NA
Benin	Pendjari NP	10.86	1.4	rainy season 2008	Hirschfeld	Microhylidae	Phrynomantis	microps	1	0	NWU	negative	NA	NA
Benin	Pendjari NP	10.86	1.4	rainy season 2008	Hirschfeld	Ptychadenidae	Ptychadena	pumilio	5	0	NWU	negative	NA	NA
Benin	Pendjari NP	10.86	1.4	rainy season 2008	Hirschfeld	Ptychadenidae	Ptychadena	tellini	3	0	NWU	negative	NA	NA
Benin	Pendjari NP	10.86	1.4	rainy season 2008	Hirschfeld	Ptychadenidae	Ptychadena	tournieri	1	0	NWU	negative	NA	NA
Benin	Pendjari NP	10.86	1.4	Oct. 2003, 5.9.2004 & 30.5.2005	Grell (1), Nago & Rödel (2)	Pipidae	Xenopus	muelleri	0	3	NWU	negative	NA	NA
Benin	Tandetagi, Albori River	11.94	3.27	2009-05-30	Hirschfeld	Dicroglossidae	Hoplobatrachus	occipitalis	2	0	MfN	negative	NA	NA
Benin	W NP	11.97	3.04	2009-05-31	Hirschfeld	Dicroglossidae	Hoplobatrachus	occipitalis	1	0	MfN	negative	NA	NA
Burkina Faso	Dano	11.21	-3.027	2003-10-21	Moritz	Dicroglossidae	Hoplobatrachus	occipitalis	0	2	NWU	negative	NA	NA
Burkina Faso	Pô	11.17	-1.15	2003-10-29	Moritz	Pipidae	Xenopus	muelleri	0	1	NWU	negative	NA	NA
Côte d'Ivoire	Banco NP	5.39	-4.05	rainy seasons 2003/2004	Assemian, Tohé, Kouamé, Rödel	Ranidae	Aubria	subsigillata	0	3	NWU	negative	NA	NA
Côte d'Ivoire	Comoé NP	8.94	-3.67	1993-06-24	Rödel	Pipidae	Xenopus	muelleri	0	1	NWU	negative	NA	NA
Côte d'Ivoire	Haute Dodo CF	4.99	-7.33	16.-18.3.2002	Rödel & Branch	Petropedetidae	Conraua	alleni	0	11	NWU	negative	NA	NA
Côte d'Ivoire	Lamto	6.22	-5.02	2009-04-15	Rödel & Ohler	Hyperoliidae	Afrixalus	vittiger	2	0	MfN	negative	NA	NA
Côte d'Ivoire	Lamto	6.22	-5.02	2009-04-15	Rödel & Ohler	Arthroleptidae	Arthroleptis	sp.	4	0	MfN	negative	NA	NA
Côte d'Ivoire	Lamto	6.22	-5.02	2009-04-15	Rödel & Ohler	Dicroglossidae	Hoplobatrachus	occipitalis	2	0	MfN	negative	NA	NA
Côte d'Ivoire	Lamto	6.22	-5.02	2009-04-15	Rödel & Ohler	Hyperoliidae	Hyperolius	concolor	1	0	MfN	negative	NA	NA
Côte d'Ivoire	Lamto	6.22	-5.02	2009-04-15	Rödel & Ohler	Hyperoliidae	Hyperolius	nasutus	1	0	MfN	negative	NA	NA
Côte d'Ivoire	Lamto	6.22	-5.02	2009-04-15	Rödel & Ohler	Hyperoliidae	Hyperolius	nitidulus	3	0	MfN	negative	NA	NA
Côte d'Ivoire	Lamto	6.22	-5.02	2009-04-15	Rödel & Ohler	Hyperoliidae	Kassina	schioetzi	3	0	MfN	negative	NA	NA
Côte d'Ivoire	Lamto	6.22	-5.02	2009-04-15	Rödel & Ohler	Hyperoliidae	Kassina	senegalensis	3	0	MfN	negative	NA	NA
Côte d'Ivoire	Lamto	6.22	-5.02	2009-04-15	Rödel & Ohler	Arthroleptidae	Leptopelis	viridis	1	0	MfN	negative	NA	NA
Côte d'Ivoire	Lamto	6.22	-5.02	2009-04-15	Rödel & Ohler	Phrynobatarchidae	Phrynobatrachus	calcaratus	2	0	MfN	negative	NA	NA
Côte d'Ivoire	Lamto	6.22	-5.02	2009-04-15	Rödel & Ohler	Phrynobatarchidae	Phrynobatrachus	francisci	1	0	MfN	negative	NA	NA
Côte d'Ivoire	Lamto	6.22	-5.02	15.04.2009 / 15.09.2004	Rödel & Ohler (2) / Adeba & Rödel (1)	Phrynobatarchidae	Phrynobatrachus	latifrons	2	1	MfN (2)/ NWU (1)	negative	NA	NA
Côte d'Ivoire	Lamto	6.22	-5.02	2009-04-15	Rödel & Ohler	Phrynobatarchidae	Phrynobatrachus	plicatus	4	0	MfN	negative	NA	NA
Côte d'Ivoire	Mont Sangbé NP	7.85	-7.38	2001-06-24	Rödel	Petropedetidae	Conraua	alleni	0	2	NWU	negative	NA	NA
Côte d'Ivoire	Mont Sangbé NP	7.85	-7.38	1905-06-23	Rödel	Dicroglossidae	Hoplobatrachus	occipitalis	0	1	NWU	negative	NA	NA
Côte d'Ivoire	Mont Sangbé NP	7.85	-7.38	2001-06-24	Rödel	Petropedetidae	Petropedetes	natator	0	1	NWU	negative	NA	NA
Côte d'Ivoire	Mont Sangbé NP	7.85	-7.38	dry season 2001	Gbamlin	Pipidae	Silurana	tropicalis	0	1	NWU	negative	NA	NA
Côte d'Ivoire	Port Genti, near Tai NP	5.88	-7.47	2002-09-01	Hillers	Phrynobatarchidae	Phrynobatrachus	latifrons	0	1	NWU	negative	NA	NA
Côte d'Ivoire	Tai NP	5.91	-7.33	Oct. 2001	Adeba & Rödel	Ranidae	Aubria	subsigillata	0	1	NWU	negative	NA	NA
Côte d'Ivoire	Tai NP	5.91	-7.33	Oct. 2001	Rödel	Caecilidae	Geotrypetes	seraphini	0	2	NWU	negative	NA	NA
Côte d'Ivoire	Tai NP	5.91	-7.33	Mar. 2002	Cesar	Pipidae	Silurana	tropicalis	0	1	NWU	negative	NA	NA
Ghana	Accra (airport)*	NA	NA	2011-06-18	Wombwell	Arthroleptidae	Astylosternus	occidentalis	1	0	IoZ	negative	NA	NA
Ghana	Accra (airport)*	NA	NA	2011-06-14	Wombwell	Hyperoliidae	Hyperolius	sp.	9	0	IoZ	negative	NA	NA
Ghana	Accra (airport)*	NA	NA	2011-06-14	Wombwell	Hyperoliidae	Kassina	senegalensis	6	0	IoZ	negative	NA	NA
Ghana	Accra (airport)*	NA	NA	14.6. & 18.6.2011	Wombwell	Microhylidae	Phrynomantis	microps	31	0	IoZ	negative	NA	NA
Ghana	Accra (airport)*	NA	NA	2011-06-18	Wombwell	Pyxicephalidae	Pyxicephalus	edulis	5	0	IoZ	negative	NA	NA
Ghana	Amedzofe	6.85	0.44	13.-14.7.2005	Agyei & Hillers	Petropedetidae	Conraua	derooi	0	3	NUW	negative	NA	NA
Ghana	Amedzofe	6.84	0.44	2005-07-10	Agyei & Hillers	Pipidae	Silurana	tropicalis	0	1	NUW	negative	NA	NA
Ghana	Ankasa NP	5.29	-2.64	2005-08-05	Agyei & Hillers	Ranidae	Aubria	subsigillata	0	1	NUW	negative	NA	NA
Ghana	Ankasa NP	5.29	-2.64	2005-08-05	Agyei & Hillers	Phrynobatarchidae	Phrynobatrachus	latifrons	0	1	NUW	negative	NA	NA
Ghana	Atewa Hills	6.23	-0.56	26.5.2011	McElroy, Ofori-Boateng, Portik, Reid, Leaché	Bufonidae	Amietophrynus	togoensis	2	0	UW	negative	yes	yes
Ghana	Atewa Hills	6.23	-0.56	26.5.2011	McElroy, Ofori-Boateng, Portik, Reid, Leaché	Arthroleptidae	Arthroleptis	poecilonotus	3	0	UW	negative	yes	yes
Ghana	Atewa Hills	6.23	-0.56	27.5.2011	McElroy, Ofori-Boateng, Portik, Reid, Leaché	Arthroleptidae	Astylosternus	occidentalis	2	0	UW	negative	yes	yes
Ghana	Atewa Hills	6.23	-0.56	27.5.2011	McElroy, Ofori-Boateng, Portik, Reid, Leaché	Ranidae	Hylarana	albolabris	3	0	UW	negative	NA	yes
Ghana	Atewa Hills	6.23	-0.56	26.5.2011	McElroy, Ofori-Boateng, Portik, Reid, Leaché	Hyperoliidae	Kassina	arboricola	2	0	UW	negative	yes	yes
Ghana	Atewa Hills	6.23	-0.56	26.5.2011	McElroy, Ofori-Boateng, Portik, Reid, Leaché	Phrynobatarchidae	Phrynobatrachus	calcaratus	1	0	UW	negative	yes	yes
Ghana	Atewa Hills	6.23	-0.56	26.5.2011	McElroy, Ofori-Boateng, Portik, Reid, Leaché	Phrynobatarchidae	Phrynobatrachus	tokba	1	0	UW	negative	yes	yes
Ghana	Atewa Hills, pond	6.24	-0.55	26.5.2011	McElroy, Ofori-Boateng, Portik, Reid, Leaché	Hyperoliidae	Afrixalus	dorsalis	1	0	UW	negative	yes	yes
Ghana	Atewa Hills, pond	6.24	-0.55	26.5.2011	McElroy, Ofori-Boateng, Portik, Reid, Leaché	Hyperoliidae	Afrixalus	nigeriensis	1	0	UW	negative	yes	yes
Ghana	Atewa Hills, pond	6.24	-0.55	26.5.2011	McElroy, Ofori-Boateng, Portik, Reid, Leaché	Ranidae	Aubria	subsigillata	2	0	UW	negative	no	yes
Ghana	Atewa Hills, pond	6.24	-0.55	26.5.2011	McElroy, Ofori-Boateng, Portik, Reid, Leaché	Hyperoliidae	Hyperolius	bobirensis	2	0	UW	negative	yes	yes
Ghana	Atewa Hills, pond	6.24	-0.55	26.5.2011	McElroy, Ofori-Boateng, Portik, Reid, Leaché	Hyperoliidae	Hyperolius	fusciventris	1	0	UW	negative	yes	yes
Ghana	Atewa Hills, pond	6.24	-0.55	26.5.2011	McElroy, Ofori-Boateng, Portik, Reid, Leaché	Hyperoliidae	Hyperolius	picturatus	2	0	UW	negative	yes	yes
Ghana	Atewa Hills, pond	6.24	-0.55	26.5.2011	McElroy, Ofori-Boateng, Portik, Reid, Leaché	Hyperoliidae	Hyperolius	sylvaticus	2	0	UW	negative	yes	yes
Ghana	Atewa Hills, pond	6.24	-0.55	26.5.2011	McElroy, Ofori-Boateng, Portik, Reid, Leaché	Arthroleptidae	Leptopelis	spiritusnoctis	1	0	UW	negative	yes	yes
Ghana	Atewa Hills, pond	6.24	-0.55	26.5.2011	McElroy, Ofori-Boateng, Portik, Reid, Leaché	Hyperoliidae	Phlyctimantis	boulengeri	2	0	UW	negative	yes	yes
Ghana	Atewa Hills, pond	6.24	-0.55	26.5.2011	McElroy, Ofori-Boateng, Portik, Reid, Leaché	Phrynobatarchidae	Phrynobatrachus	calcaratus	1	0	UW	negative	yes	yes
Ghana	Atewa Hills, pond	6.24	-0.55	26.5.2011	McElroy, Ofori-Boateng, Portik, Reid, Leaché	Phrynobatarchidae	Phrynobatrachus	plicatus	1	0	UW	negative	yes	yes
Ghana	Atewa Hills, pond	6.24	-0.55	26.5.2011	McElroy, Ofori-Boateng, Portik, Reid, Leaché	Phrynobatarchidae	Phrynobatrachus	sp.	1	0	UW	negative	yes	yes
Ghana	Atewa Hills, pond	6.24	-0.55	26.5.2011	McElroy, Ofori-Boateng, Portik, Reid, Leaché	Pipidae	Silurana	tropicalis	6	0	UW	negative	NA	yes
Ghana	Atewa Hills, stream	6.23	-0.55	25.5.2011	McElroy, Ofori-Boateng, Portik, Reid, Leaché	Arthroleptidae	Arthroleptis	poecilonotus	1	0	UW	negative	yes	yes
Ghana	Atewa Hills, stream	6.23	-0.55	25.5.2011	McElroy, Ofori-Boateng, Portik, Reid, Leaché	Petropedetidae	Conraua	derooi	5	0	UW	negative	no	yes
Ghana	Biakpa	6.84	0.42	15.-16.7.2005	Agyei & Hillers	Petropedetidae	Conraua	derooi	0	4	NUW	negative	NA	NA
Ghana	Bobiri FR	6.69	-1.34	22.5.2011	McElroy, Ofori-Boateng, Portik, Reid, Leaché	Hyperoliidae	Afrixalus	dorsalis	2	0	UW	negative	yes	yes
Ghana	Bobiri FR	6.69	-1.34	22.5.2011	McElroy, Ofori-Boateng, Portik, Reid, Leaché	Bufonidae	Amietophrynus	maculatus	3	0	UW	negative	yes	yes
Ghana	Bobiri FR	6.69	-1.34	22.5.2011	McElroy, Ofori-Boateng, Portik, Reid, Leaché	Arthroleptidae	Arthroleptis	poecilonotus	1	0	UW	negative	no	yes
Ghana	Bobiri FR	6.69	-1.34	22.5.2011	McElroy, Ofori-Boateng, Portik, Reid, Leaché	Rhacophoridae	Chiromantis	rufescens	1	0	UW	negative	yes	yes
Ghana	Bobiri FR	6.69	-1.32	2005-07-25	Agyei & Hillers	Dicroglossidae	Hoplobatrachus	occipitalis	0	1	NUW	negative	NA	NA
Ghana	Bobiri FR	6.69	-1.34	22.5.2011	McElroy, Ofori-Boateng, Portik, Reid, Leaché	Dicroglossidae	Hoplobatrachus	occipitalis	2	0	UW	negative	no	yes
Ghana	Bobiri FR	6.69	-1.34	22.5.2011	McElroy, Ofori-Boateng, Portik, Reid, Leaché	Arthroleptidae	Leptopelis	spiritusnoctis	1	0	UW	negative	yes	yes
Ghana	Bobiri FR	6.69	-1.32	2005-07-27	Agyei & Hillers	Phrynobatarchidae	Phrynobatrachus	latifrons	0	2	NUW	negative	NA	NA
Ghana	Bobiri FR	6.69	-1.34	22.5.2011	McElroy, Ofori-Boateng, Portik, Reid, Leaché	Phrynobatarchidae	Phrynobatrachus	latifrons	2	0	UW	negative	yes	yes
Ghana	Bobiri FR	6.69	-1.34	22.5.2011	McElroy, Ofori-Boateng, Portik, Reid, Leaché	Phrynobatarchidae	Phrynobatrachus	plicatus	2	0	UW	negative	no	yes
Ghana	Bobiri FR	6.69	-1.34	22.5.2011	McElroy, Ofori-Boateng, Portik, Reid, Leaché	Ptychadenidae	Ptychadena	bibroni	1	0	UW	negative	yes	yes
Ghana	Bobiri FR	6.69	-1.34	22.5.2011	McElroy, Ofori-Boateng, Portik, Reid, Leaché	Ptychadenidae	Ptychadena	longirostris	2	0	UW	negative	no	yes
Ghana	Boi Tano	5.53	-2.62	2003-10-30	Agyei & Ernst	Ranidae	Aubria	subsigillata	0	1	NUW	negative	NA	NA
Ghana	Bui NP	8.29	-2.28	15.5.2011	McElroy, Ofori-Boateng, Portik, Reid, Leaché	Hyperoliidae	Afrixalus	vittiger	2	0	UW	negative	yes	yes
Ghana	Bui NP	8.29	-2.28	15.5.2011	McElroy, Ofori-Boateng, Portik, Reid, Leaché	Bufonidae	Amietophrynus	regularis	1	0	UW	negative	no	yes
Ghana	Bui NP	8.29	-2.28	15.5.2011	McElroy, Ofori-Boateng, Portik, Reid, Leaché	Hemisotidae	Hemisus	marmoratus	2	0	UW	negative	no	yes
Ghana	Bui NP	8.29	-2.28	15.5.2011	McElroy, Ofori-Boateng, Portik, Reid, Leaché	Ranidae	Hylarana	galamensis	1	0	UW	negative	no	yes
Ghana	Bui NP	8.29	-2.28	15.5.2011	McElroy, Ofori-Boateng, Portik, Reid, Leaché	Hyperoliidae	Hyperolius	nitidulus	1	0	UW	negative	no	yes
Ghana	Bui NP	8.29	-2.28	15.5.2011	McElroy, Ofori-Boateng, Portik, Reid, Leaché	Hyperoliidae	Kassina	senegalensis	3	0	UW	negative	no	yes
Ghana	Bui NP	8.29	-2.28	15.5.2011	McElroy, Ofori-Boateng, Portik, Reid, Leaché	Arthroleptidae	Leptopelis	viridis	1	0	UW	negative	yes	yes
Ghana	Bui NP	8.29	-2.28	15.5.2011	McElroy, Ofori-Boateng, Portik, Reid, Leaché	Phrynobatarchidae	Phrynobatrachus	calcaratus	1	0	UW	negative	yes	yes
Ghana	Bui NP, Lobia Stream	8.29	-2.29	14.5.2011	McElroy, Ofori-Boateng, Portik, Reid, Leaché	Dicroglossidae	Hoplobatrachus	occipitalis	1	0	UW	negative	no	yes
Ghana	Bui NP, Lobia Stream	8.29	-2.29	14.5.2011	McElroy, Ofori-Boateng, Portik, Reid, Leaché	Ranidae	Hylarana	galamensis	2	0	UW	negative	no	yes
Ghana	Bui NP, Lobia Stream	8.29	-2.29	14.5.2011	McElroy, Ofori-Boateng, Portik, Reid, Leaché	Arthroleptidae	Leptopelis	viridis	1	0	UW	negative	no	yes
Ghana	Bui NP, Lobia Stream	8.29	-2.29	14.5.2011	McElroy, Ofori-Boateng, Portik, Reid, Leaché	Phrynobatarchidae	Phrynobatrachus	francisci	1	0	UW	negative	yes	yes
Ghana	Bui NP, Lobia Stream	8.29	-2.29	14.5.2011	McElroy, Ofori-Boateng, Portik, Reid, Leaché	Phrynobatarchidae	Phrynobatrachus	latifrons	1	0	UW	negative	no	yes
Ghana	Bui NP, Lobia Stream	8.29	-2.29	14.5.2011	McElroy, Ofori-Boateng, Portik, Reid, Leaché	Ptychadenidae	Ptychadena	cf. mascareniensis	1	0	UW	negative	no	yes
Ghana	Bui NP, Lobia Stream	8.29	-2.29	14.5.2011	McElroy, Ofori-Boateng, Portik, Reid, Leaché	Ptychadenidae	Ptychadena	oxyrhynchus	1	0	UW	negative	no	yes
Ghana	Bui NP, Lobia Stream	8.29	-2.29	14.5.2011	McElroy, Ofori-Boateng, Portik, Reid, Leaché	Pipidae	Xenopus	muelleri	1	0	UW	negative	no	yes
Ghana	Draw River	5.16	-2.39	2003-10-23	Agyei & Ernst	Phrynobatarchidae	Phrynobatrachus	latifrons	0	1	NUW	negative	NA	NA
Ghana	Fian	10.39	-2.46	17.5.2011	McElroy, Ofori-Boateng, Portik, Reid, Leaché	Arthroleptidae	Leptopelis	viridis	1	0	UW	negative	no	yes
Ghana	Fian	10.39	-2.46	17.5.2011	McElroy, Ofori-Boateng, Portik, Reid, Leaché	Microhylidae	Phrynomantis	microps	1	0	UW	negative	no	yes
Ghana	Gbelle FR	10.4	-2.06	20.5.2011	McElroy, Ofori-Boateng, Portik, Reid, Leaché	Hemisotidae	Hemisus	marmoratus	3	0	UW	negative	no	yes
Ghana	Gbelle FR	10.4	-2.06	20.5.2011	McElroy, Ofori-Boateng, Portik, Reid, Leaché	Ptychadenidae	Ptychadena	tellini	1	0	UW	negative	no	yes
Ghana	Kakum National Park	5.45	-1.42	2005-08-09	Agyei & Hillers	Phrynobatarchidae	Phrynobatrachus	latifrons	0	1	NUW	negative	NA	NA
Ghana	Kakum National Park	5.45	-1.42	2005-08-09	Agyei & Hillers	Pipidae	Silurana	tropicalis	0	1	NUW	negative	NA	NA
Ghana	Kumasi	6.83	-1.72	23.5.2011	McElroy, Ofori-Boateng, Portik, Reid, Leaché	Bufonidae	Amietophrynus	maculatus	3	0	UW	negative	yes	yes
Ghana	Kumasi	6.84	-1.73	23.5.2011	McElroy, Ofori-Boateng, Portik, Reid, Leaché	Arthroleptidae	Arthroleptis	poecilonotus	1	0	UW	negative	yes	yes
Ghana	Kumasi	6.83	-1.73	23.5.2011	McElroy, Ofori-Boateng, Portik, Reid, Leaché	Ranidae	Hylarana	albolabris	3	0	UW	negative	yes	yes
Ghana	Kumasi	6.83	-1.72	23.5.2011	McElroy, Ofori-Boateng, Portik, Reid, Leaché	Hyperoliidae	Hyperolius	concolor	2	0	UW	negative	yes	yes
Ghana	Kumasi	6.83	-1.73	23.5.2011	McElroy, Ofori-Boateng, Portik, Reid, Leaché	Hyperoliidae	Hyperolius	concolor	2	0	UW	negative	yes	yes
Ghana	Kumasi	6.84	-1.72	23.5.2011	McElroy, Ofori-Boateng, Portik, Reid, Leaché	Hyperoliidae	Hyperolius	guttulatus	2	0	UW	negative	yes	yes
Ghana	Kumasi	6.83	-1.73	23.5.2011	McElroy, Ofori-Boateng, Portik, Reid, Leaché	Arthroleptidae	Leptopelis	spiritusnoctis	2	0	UW	negative	yes	yes
Ghana	Kumasi	6.83	-1.73	23.5.2011	McElroy, Ofori-Boateng, Portik, Reid, Leaché	Ptychadenidae	Ptychadena	longirostris	1	0	UW	negative	yes	yes
Ghana	Leklebi-Agbesia	6.93	0.48	2005-07-19	Agyei & Hillers	Dicroglossidae	Hoplobatrachus	occipitalis	0	1	NUW	negative	NA	NA
Ghana	Leklebi-Fiafe	6.95	0.49	20.-21.7.2005	Agyei & Hillers	Phrynobatarchidae	Phrynobatrachus	latifrons	0	8	NUW	negative	NA	NA
Ghana	Owabi Wildlife Sanctuary	6.75	-1.7	2005-07-31	Agyei & Hillers	Phrynobatarchidae	Phrynobatrachus	latifrons	0	1	NUW	negative	NA	NA
Ghana	Jukwa FR	5.36667	0.716669	2009-12-29	Adum	Bufonidae	Amietophrynus	maculatus	1	0	IoZ	negative	NA	NA
Ghana	Jukwa FR	5.36667	0.716669	2009-12-29	Adum	Arthroleptidae	Arthroleptis	spp.	3	0	IoZ	negative	NA	NA
Ghana	Jukwa FR	5.36667	0.716669	2009-12-29	Adum	Dicroglossidae	Hoplobatrachus	occidentalis	4	0	IoZ	negative	NA	NA
Ghana	Jukwa FR	5.36667	0.716669	2009-12-29	Adum	Phrynobatarchidae	Phrynobatrachus	alleni	2	0	IoZ	negative	NA	NA
Ghana	Jukwa FR	5.36667	0.716669	2009-12-29	Adum	Phrynobatarchidae	Phrynobatrachus	calcaratus	1	0	IoZ	negative	NA	NA
Ghana	Jukwa FR	5.36667	0.716669	2009-12-29	Adum	Phrynobatarchidae	Phrynobatrachus	latifrons	5	0	IoZ	negative	NA	NA
Ghana	Jukwa FR	5.36667	0.716669	2009-12-29	Adum	Phrynobatarchidae	Phrynobatrachus	liberiensis	3	0	IoZ	negative	NA	NA
Ghana	Jukwa FR	5.36667	0.716669	2009-12-29	Adum	Phrynobatarchidae	Phrynobatrachus	plicatus	2	0	IoZ	negative	NA	NA
Ghana	Jukwa FR	5.36667	0.716669	2009-12-29	Adum	Ptychadenidae	Ptychadena	aequiplicata	2	0	IoZ	negative	NA	NA
Ghana	Krokosua Hills FR	6.58143	-2.81043	5.10.2009; 6.10.2009; 13.12.2009	Adum	Bufonidae	Amietophrynus	maculatus	1	0	IoZ	negative	NA	NA
Ghana	Krokosua Hills FR	6.58143	-2.81043	5.10.2009; 6.10.2009; 13.12.2009	Adum	Arthroleptidae	Arthroleptis	spp.	2	0	IoZ	negative	NA	NA
Ghana	Krokosua Hills FR	6.58143	-2.81043	5.10.2009; 6.10.2009; 13.12.2009	Adum	Ranidae	Hylarana	albolabris	3	0	IoZ	negative	NA	NA
Ghana	Krokosua Hills FR	6.58143	-2.81043	5.10.2009; 6.10.2009; 13.12.2009	Adum	Phrynobatarchidae	Phrynobatrachus	alleni	2	0	IoZ	negative	NA	NA
Ghana	Krokosua Hills FR	6.58143	-2.81043	5.10.2009; 6.10.2009; 13.12.2009	Adum	Phrynobatarchidae	Phrynobatrachus	annulatus	3	0	IoZ	negative	NA	NA
Ghana	Krokosua Hills FR	6.58143	-2.81043	5.10.2009; 6.10.2009; 13.12.2009	Adum	Phrynobatarchidae	Phrynobatrachus	calcaratus	1	0	IoZ	negative	NA	NA
Ghana	Krokosua Hills FR	6.58143	-2.81043	5.10.2009; 6.10.2009; 13.12.2009	Adum	Phrynobatarchidae	Phrynobatrachus	liberiensis	8	0	IoZ	negative	NA	NA
Ghana	Krokosua Hills FR	6.58143	-2.81043	5.10.2009; 6.10.2009; 13.12.2009	Adum	Phrynobatarchidae	Phrynobatrachus	plicatus	2	0	IoZ	negative	NA	NA
Ghana	Krokosua Hills FR	6.58143	-2.81043	5.10.2009; 6.10.2009; 13.12.2009	Adum	Phrynobatarchidae	Phrynobatrachus	tokba	1	0	IoZ	negative	NA	NA
Ghana	Krokosua Hills FR	6.58143	-2.81043	5.10.2009; 6.10.2009; 13.12.2009	Adum	Ptychadenidae	Ptychadena	aequiplicata	1	0	IoZ	negative	NA	NA
Ghana	Krokosua Hills FR	6.58143	-2.81043	5.10.2009; 6.10.2009; 13.12.2009	Adum	Ptychadenidae	Ptychadena	longirostris	2	0	IoZ	negative	NA	NA
Ghana	Krokosua Hills FR	6.61	-2.85	2003-11-07	Agyei & Ernst	Pipidae	Silurana	tropicalis	0	1	NUW	negative	NA	NA
Ghana	Suhuma FR	6.25285	-2.63433	29.9.2009; 2.10.2009; 18.11.2009	Adum	Bufonidae	Amietophrynus	togoensis	1	0	IoZ	negative	NA	NA
Ghana	Suhuma FR	6.25285	-2.63433	29.9.2009; 2.10.2009; 18.11.2009	Adum	Arthroleptidae	Arthroleptis	spp.	6	0	IoZ	negative	NA	NA
Ghana	Suhuma FR	6.25285	-2.63433	29.9.2009; 2.10.2009; 18.11.2009	Adum	Arthroleptidae	Cardoglossa	occidentalis	1	0	IoZ	negative	NA	NA
Ghana	Suhuma FR	6.25285	-2.63433	29.9.2009; 2.10.2009; 18.11.2009	Adum	Ranidae	Hylarana	albolabris	1	0	IoZ	negative	NA	NA
Ghana	Suhuma FR	6.25285	-2.63433	29.9.2009; 2.10.2009; 18.11.2009	Adum	Ranidae	Hylarana	occidentalis	1	0	IoZ	negative	NA	NA
Ghana	Suhuma FR	6.25285	-2.63433	29.9.2009; 2.10.2009; 18.11.2009	Adum	Arthroleptidae	Leptopelis	spiritusnoctis	1	0	IoZ	negative	NA	NA
Ghana	Suhuma FR	6.25285	-2.63433	29.9.2009; 2.10.2009; 18.11.2009	Adum	Phrynobatarchidae	Phrynobatrachus	alleni	4	0	IoZ	negative	NA	NA
Ghana	Suhuma FR	6.25285	-2.63433	29.9.2009; 2.10.2009; 18.11.2009	Adum	Phrynobatarchidae	Phrynobatrachus	annulatus	3	0	IoZ	negative	NA	NA
Ghana	Suhuma FR	6.25285	-2.63433	29.9.2009; 2.10.2009; 18.11.2009	Adum	Phrynobatarchidae	Phrynobatrachus	calcaratus	1	0	IoZ	negative	NA	NA
Ghana	Suhuma FR	6.25285	-2.63433	29.9.2009; 2.10.2009; 18.11.2009	Adum	Phrynobatarchidae	Phrynobatrachus	liberiensis	6	0	IoZ	negative	NA	NA
Ghana	Suhuma FR	6.25285	-2.63433	29.9.2009; 2.10.2009; 18.11.2009	Adum	Phrynobatarchidae	Phrynobatrachus	plicatus	3	0	IoZ	negative	NA	NA
Ghana	Suhuma FR	6.25285	-2.63433	29.9.2009; 2.10.2009; 18.11.2009	Adum	Ptychadenidae	Ptychadena	aequiplicata	2	0	IoZ	negative	NA	NA
Ghana	Sui River FR	6.21133	-2.69475	17.11.2009; 15.12.2009; 18.12.2009	Adum	Bufonidae	Amietophrynus	maculatus	1	0	IoZ	negative	NA	NA
Ghana	Sui River FR	6.21133	-2.69475	17.11.2009; 15.12.2009; 18.12.2009	Adum	Arthroleptidae	Arthroleptis	spp.	3	0	IoZ	negative	NA	NA
Ghana	Sui River FR	6.21133	-2.69475	17.11.2009; 15.12.2009; 18.12.2009	Adum	Ranidae	Hylarana	albolabris	1	0	IoZ	negative	NA	NA
Ghana	Sui River FR	6.21133	-2.69475	17.11.2009; 15.12.2009; 18.12.2009	Adum	Ranidae	Hylarana	occidentalis	1	0	IoZ	negative	NA	NA
Ghana	Sui River FR	6.21133	-2.69475	17.11.2009; 15.12.2009; 18.12.2009	Adum	Phrynobatarchidae	Phrynobatrachus	alleni	2	0	IoZ	negative	NA	NA
Ghana	Sui River FR	6.21133	-2.69475	17.11.2009; 15.12.2009; 18.12.2009	Adum	Phrynobatarchidae	Phrynobatrachus	annulatus	3	0	IoZ	negative	NA	NA
Ghana	Sui River FR	6.21133	-2.69475	17.11.2009; 15.12.2009; 18.12.2009	Adum	Phrynobatarchidae	Phrynobatrachus	calcaratus	2	0	IoZ	negative	NA	NA
Ghana	Sui River FR	6.21133	-2.69475	17.11.2009; 15.12.2009; 18.12.2009	Adum	Phrynobatarchidae	Phrynobatrachus	liberiensis	2	0	IoZ	negative	NA	NA
Ghana	Sui River FR	6.21133	-2.69475	17.11.2009; 15.12.2009; 18.12.2009	Adum	Phrynobatarchidae	Phrynobatrachus	plicatus	5	0	IoZ	negative	NA	NA
Ghana	Wli Waterfall	6.86	0.47	10.-11.8.2001	Rödel	Phrynobatarchidae	Phrynobatrachus	latifrons	0	7	NUW	negative	NA	NA
Ghana	Biakpa	6.84	0.42	2005-07-16	Agyei & Hillers	Pipidae	Silurana	tropicalis	0	1	NUW	negative	NA	NA
Guinea	Boké Préfécture/Kolaboui	10.75	-14.44	2005-04-25	Bangoura & Hillers	Pipidae	Silurana	tropicalis	0	1	NUW	negative	NA	NA
Guinea	Déré CF	7.6	-8.21	2003-11-17	Bangoura & Rödel	Phrynobatarchidae	Phrynobatrachus	latifrons	0	2	NUW	negative	NA	NA
Guinea	Diécké CF	7.6	-8.86	2003-11-25	Bangoura & Rödel	Petropedetidae	Conraua	alleni	0	3	NUW	negative	NA	NA
Guinea	Diécké CF	7.6	-8.87	2003-11-24	Bangoura & Rödel	Pipidae	Silurana	tropicalis	0	1	NUW	negative	NA	NA
Guinea	Mont Béro CF	8.14	-8.57	2003-11-30	Bangoura & Rödel	Petropedetidae	Conraua	alleni	0	4	NUW	negative	NA	NA
Guinea	Mont Béro CF	8.14	-8.57	3.-4.12.2003	Bangoura & Rödel	Petropedetidae	Petropedetes	natator	0	6	NUW	negative	NA	NA
Guinea	Mont Béro CF	8.14	-8.55	2003-12-01	Bangoura & Rödel	Phrynobatarchidae	Phrynobatrachus	latifrons	0	2	NUW	negative	NA	NA
Guinea	Monts Nimba	7.66	-8.38	2007-06-23	Sandberger & Doumbia	Arthroleptidae	Cardoglossa	occidentalis	1	0	IoZ	negative	NA	NA
Guinea	Monts Nimba	7.66	-8.38	24.06.2007, 2008, 2009	Sandberger & Doumbia	Petropedetidae	Conraua	alleni	52	0	IoZ	negative	NA	NA
Guinea	Monts Nimba	7.66	-8.38	23., 25., 29., 30.06., 7.7., 3.8., 11.8., 23.8., 25.8.2007, rainy season 2008	Sandberger	Bufonidae	Nimbaphrynoides	occidentalis occidentalis	52	0	NUW (22), IoZ (30)	negative	NA	NA
Guinea	Monts Nimba	7.66	-8.38	24., 27.06.2007, 2008, 2009	Sandberger & Doumbia	Petropedetidae	Pedropedetes	natator	138	0	IoZ	negative	NA	NA
Guinea	Pic de Fon, Simandou	8.51	-8.94	06.11.2002, 30.07.2004	Bangoura & Rödel	Petropedetidae	Conraua	alleni	0	8	NUW	negative	NA	NA
Guinea	Pic de Fon, Simandou	8.51	-8.94	2.-11.7.2004	Bangoura	Caecilidae	Geotrypetes	seraphini	0	3	NUW	negative	NA	NA
Guinea	Pic de Fon, Simandou	8.51	-8.94	30.09.2004, 8.11.2002	Bangoura & Rödel	Dicroglossidae	Hoplobatrachus	occipitalis	0	2	NUW	negative	NA	NA
Guinea	Pic de Fon, Simandou	8.51	-8.94	30.07.2004, 27.11. & 4.12.2004	Bangoura (1), Bangoura & Rödel (5)	Petropedetidae	Petropedetes	natator	0	6	NUW	negative	NA	NA
Guinea	Pic de Fon, Simandou	8.51	-8.94	08.11.2002, 02.12.2002	Bangoura (4), Rödel (2)	Phrynobatarchidae	Phrynobatrachus	latifrons	0	6	NUW	negative	NA	NA
Liberia	Gola NF	7.45	-10.69	2005-11-28	Hillers	Petropedetidae	Conraua	alleni	0	1	NUW	negative	NA	NA
Liberia	Gola NF	7.45	-10.69	28.11.2005	Hillers	Petropedetidae	Petropedetes	natator	0	1	NUW	negative	NA	NA
Liberia	Grebo NF	5.4	-7.73	9.12.2005	Hillers	Petropedetidae	Conraua	alleni	0	2	NUW	negative	NA	NA
Liberia	Monts Nimba	7.52	-8.51	rainy season 2008	Sandberger	Bufonidae	Nimbaphrynoides	occidentalis liberiensis	10	0	NUW	negative	NA	NA
Sierra Leone	Freetown	8.47	-13.22	2004-07-11	Barrie	Petropedetidae	Petropedetes	natator	0	4	NUW	negative	NA	NA
Sierra Leone	Gola North FR	7.6	-11.02	2005-09-12	Barrie & Hillers	Petropedetidae	Conraua	alleni	0	1	NUW	negative	NA	NA
Sierra Leone	Loma Mountains FR	9.21	-11.14	2005-10-03	Barrie & Hillers	Petropedetidae	Conraua	alleni	0	2	NUW	negative	NA	NA
Sierra Leone	Loma Mountains FR	9.21	-11.14	2005-10-04	Barrie & Hillers	Petropedetidae	Petropedetes	natator	0	1	NUW	negative	NA	NA
Sierra Leone	Moremba	8.09	-12.44	2004-07-07	Barrie	Pipidae	Pseudhymenochirus	merlinii	0	1	NUW	negative	NA	NA
Sierra Leone	Tiwai Island	7.54	-11.35	10.9.2005	Barrie & Hillers	Caecilidae	Geotrypetes	seraphini	0	1	NUW	negative	NA	NA
Sierra Leone	Western Area Peninsula FR	8.35	-13.18	2005-10-10	Barrie & Hillers	Petropedetidae	Petropedetes	natator	0	1	NUW	negative	NA	NA
